# Supplementary material
Source: publisher figshare collection journal article supplement (https://frontiersin.figshare.com/ndownloader/files/31070194)
Supplement: Supplementary file [file 31070194]

## Supplemental Material

### Association between CST3 Gene polymorphisms and Large Artery Atherosclerotic Stroke

#### CONTENTS

Supplemental Table 1. Comparison between enrolled and excluded patients

| Characteristics*                                | Enrolled<br>(N=3833) | Excluded (N=11333) | P-value |
|-------------------------------------------------|----------------------|--------------------|---------|
| Age, y, mean±SD                                 | 62.8±11.3            | 62.1±11.3          | <0.001  |
| Male, Sex                                       | 2602(67.9)           | 7762(68.5)         | 0.486   |
| NIHSS at admission                              |                      |                    | 0.017   |
| 0-3                                             | 2024(52.8)           | 6236(55.0)         |         |
| ≥4                                              | 1809(47.2)           | 5097(45.0)         |         |
| BMI, mean±SD                                    | 24.8±3.4             | 24.7±3.3           | 0.021   |
| Medical history                                 |                      |                    |         |
| Ischemic stroke                                 | 904(23.6)            | 2245(19.8)         | <0.001  |
| Coronary artery disease                         | 456(11.9)            | 1152(10.2)         | 0.003   |
| Hyperlipemia                                    | 326(8.5)             | 865(7.6)           | 0.083   |
| Diabetes mellitus                               | 933(24.3)            | 2577(22.7)         | 0.042   |
| Hypertension                                    | 2405(62.7)           | 7089(62.6)         | 0.831   |
| Smoking                                         | 1193(31.1)           | 3559(31.4)         | 0.747   |
| Alcohol drinking                                | 543(14.2)            | 1583(14.0)         | 0.760   |
| Laboratory data                                 |                      |                    |         |
| hs-CRP, mg/l                                    | 1.5(0.7-4.4)         | 1.9(0.9-4.9)       | <0.001  |
| CysC, mg/l                                      | 1.0(0.9-1.1)         | 0.9(0.8-1.1)       | <0.001  |
| TG, mmol/l                                      | 1.4(1.1-1.9)         | 1.4(1.0-1.9)       | 0.001   |
| TC, mmol/l                                      | 4.0(3.3-4.7)         | 4.0(3.3-4.7)       | 0.101   |
| LDL-C, mmol/l                                   | 2.4(1.8-3.1)         | 2.3(1.7-2.9)       | <0.001  |
| HDL-C, mmol/l                                   | 0.9(0.8-1.1)         | 0.9(0.8-1.1)       | 0.415   |
| eGFR <sub>cr</sub> , ml/min/1.73 m <sup>2</sup> | 91.9(79.8-101.0)     | 93.6(82.4-102.4)   | <0.001  |
| Concomitant medication                          |                      |                    |         |
| Antiplatelets                                   | 3733(97.4)           | 10880(96.0)        | <0.001  |
| Anticoagulants                                  | 399(10.4)            | 1147(10.1)         | 0.610   |
| 1-year Outcomes                                 |                      |                    |         |
| mRS 3-6                                         | 487(12.9)            | 1494(13.6)         | 0.298   |
| Stroke recurrence                               | 369(9.6)             | 1104(9.7)          | 0.836   |
| All-cause mortality                             | 116(3.0)             | 382(3.4)           | 0.301   |
| Combined vascular events                        | 386(10.1)            | 1171(10.3)         | 0.644   |

Abbreviations: SD, standard deviation; NIHSS, National Institutes of Health Stroke Scale; BMI, Body mass index; CysC, Cystatin C; hs-CRP denotes high sensitivity C reactive protein; TG, triglycerides; TC, total cholesterol; HDL, high-density lipoprotein; LDL, low-density

lipoprotein; eGFR<sub>cr</sub>, creatinine-based estimated glomerular filtration rate.  
mRS, modified Rankin Scale.

\* Variables were presented as median (interquartile range) or counts (percentages) unless otherwise indicated.
